# Supplementary material for: From biomass to high performance solar–thermal and electric–thermal energy conversion and storage materials
Source: Royal Society of Chemistry journal article supplement (doi:10.1039/c4ta00839a), 2014-01-01
Supplement: c4ta00839a1.pdf [file c4ta00839a1.pdf]

## Supporting Information

### From Biomass to High Performance Solar-Thermal and Electric-Thermal Energy Conversion and Storage Materials

*Yuan-Qing Li,\* Yarjan Abdul Samad, Kyriaki Polychronopoulou, Saeed M. Alhassan, and Kin Liao \**

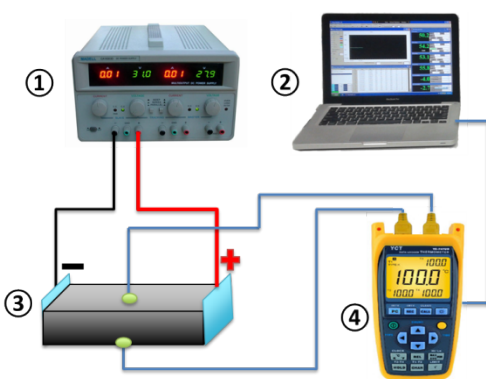

Figure S1. The schematic of electrical-thermal energy conversion and storage measuring system: (1) DC power supply, (2) computer, (3) CA/wax composite, and (4) thermometer.

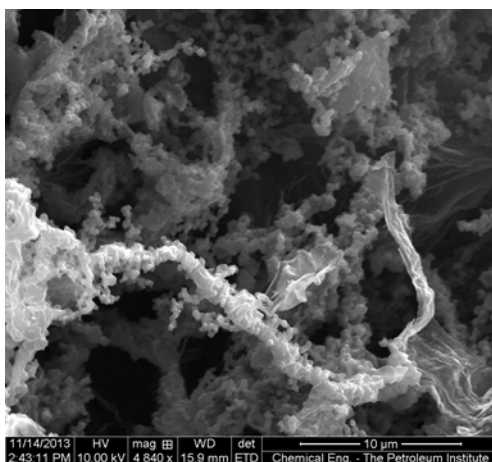

Figure S2. High magnification SEM image of CA from watermelon.

Table S1. Properties of carbon aerogel from various melons:

| Samples | Raw materials | Density (g/cm <sup>3</sup> ) |        | Electrical conductivity (S/m) |     |
|---------|---------------|------------------------------|--------|-------------------------------|-----|
|         |               | Average                      | SD*    | Average                       | SD* |
| CA-WI   | Winter melon  | 0.048                        | 0.0023 | 6.5                           | 1.6 |
| CA-WA   | Water melon   | 0.051                        | 0.0027 | 3.8                           | 1.0 |
| CA-PU   | Pumpkin       | 0.054                        | 0.0019 | 5.3                           | 1.0 |

SD: standard deviation.

Table S2. Phase change behavior of paraffin wax, BS/wax composite, and BS/wax composites after aging.

| Sample           | Phase transition | $\Delta H$ (J/g) |               | $T_r$ (°C)    |               |
|------------------|------------------|------------------|---------------|---------------|---------------|
|                  |                  | Heating cycle    | Cooling cycle | Heating cycle | Cooling cycle |
| Paraffin wax     | Solid-liquid     | 122.3            | 134.1         | 53.24         | 49.4          |
| BS/wax composite | Form-stable      | 115.2            | 126.9         | 53.53         | 48.3          |
| BS/wax EA        | Form-stable      | 114.4            | 126.8         | 54.7          | 47.04         |
| BS/wax OA        | Form-stable      | 116.5            | 129.8         | 53.19         | 48.87         |
| BS/wax TA        | Form-stable      | 113.2            | 127.1         | 54.7          | 47.04         |
